# Supplementary material
Source: publisher figshare collection journal article supplement (https://acs.figshare.com/ndownloader/files/9112183)
Supplement: Supplementary file 1 [file 9112183]

# Supporting Information

## Charge Transfer at the PTCDA/Black Phosphorus Interface

Can Wang,<sup>†,‡</sup> Dongmei Niu,<sup>\*,†</sup> Baoxing Liu,<sup>†</sup> Shitan Wang,<sup>†</sup> Xuhui Wei,<sup>†</sup> Yuquan  
Liu,<sup>†</sup> Haipeng Xie,<sup>\*,†</sup> and Yongli Gao<sup>\*,†,¶</sup>

<sup>†</sup>*Hunan Key Laboratory for Super-Microstructure and Ultrafast Process, School of Physics  
and Electronics, Central South University, Changsha, Hunan 410012, People's Republic of  
China*

<sup>‡</sup>*Light Alloy Research Institute, Central South University, Changsha 410083, People's  
Republic of China*

<sup>¶</sup>*Department of Physics and Astronomy, University of Rochester, Rochester, New York  
14627, USA*

E-mail: mayee@csu.edu.cn; xhpxhpxhp89@csu.edu.cn; ygao@pas.rochester.edu

# 1 XPS full spectrum

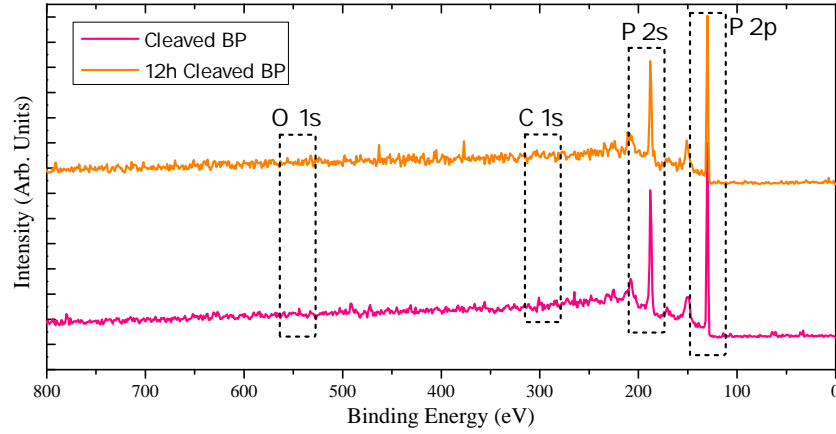

Figure S1: The survey XPS spectrum of the cleaved BP (red line) and 12h cleaved BP (yellow line). No observed O and C peaks are observed due to the BP is cleaved at UHV condition, even after 12 hours in our main chamber.

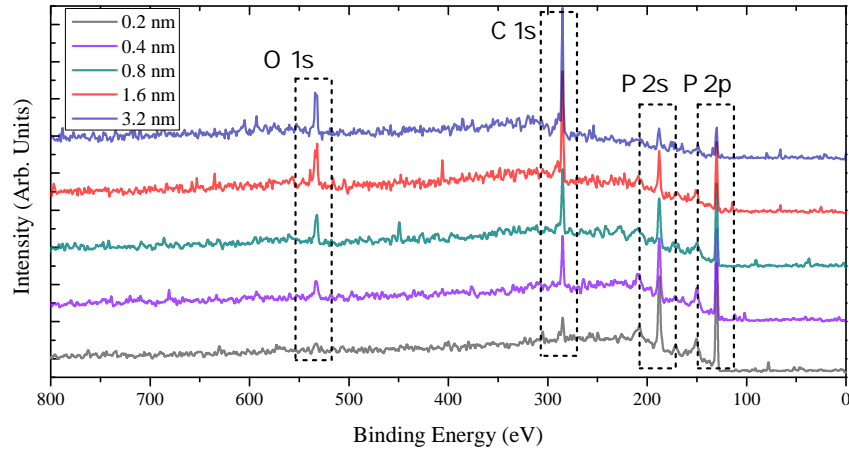

Figure S2: The survey XPS spectrum of the different thickness PTCDA on cleaved BP. It is found that the intensity of P 2p and 2s decrease monotonically with increasing PTCDA coverage from 0.2 nm to 3.2 nm. Inversely, the intensity of C 1s and O 1s increase with increasing PTCDA coverage.

## 2 LEED pattern

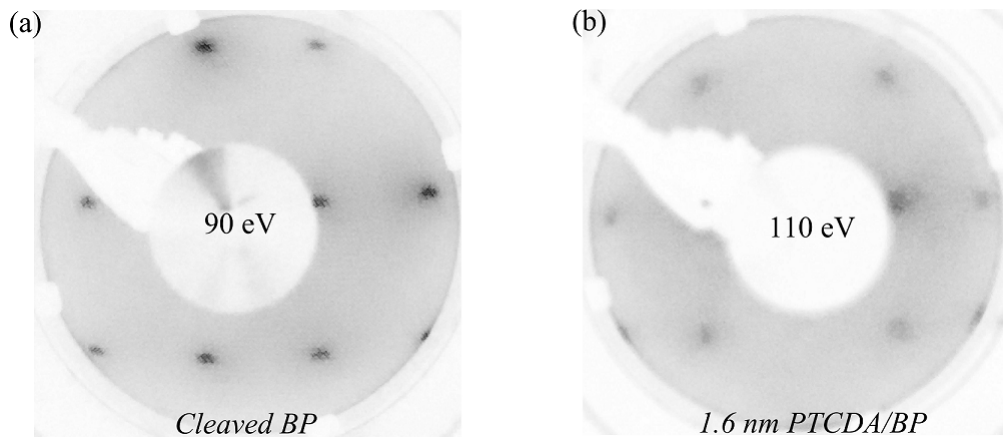

Figure S3: LEED images of (a) the clean cleaved BP surface, recorded at  $E_{kin} = 90$  eV; (b) a 1.6 nm thin film PTCDA/BP, recorded at  $E_{kin} = 110$  eV. As the diffraction spots are weak and diffuse, the LEED pattern also indicates that there is a rather weak ordering relative to the substrate and with relatively small domain sizes.

### 3 Atomic force microscopy

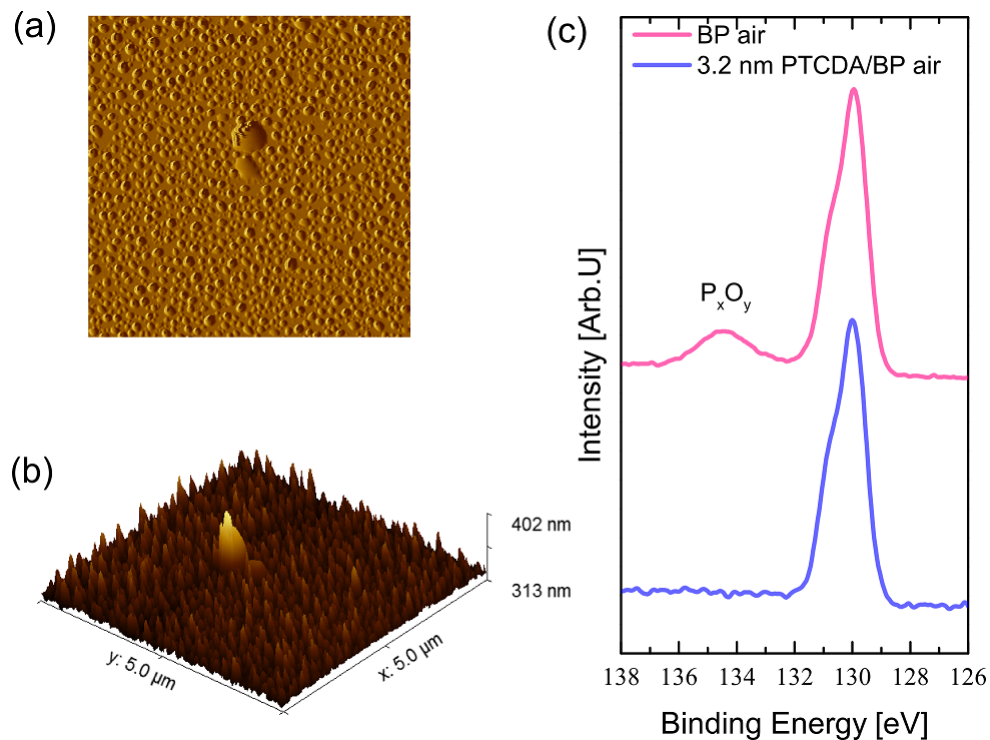

Figure S4: (a) and (b) AFM image of cleaved BP substrate in ambient conditions for 3 hours,  $5 \times 5$  micrometer. (c) P 2p core-level X-ray photoelectron spectra of a bulk BP crystal and 3.2 nm PTCDA/BP sample upon 3 hours exposure in ambient air.

## 4 Optimization calculations

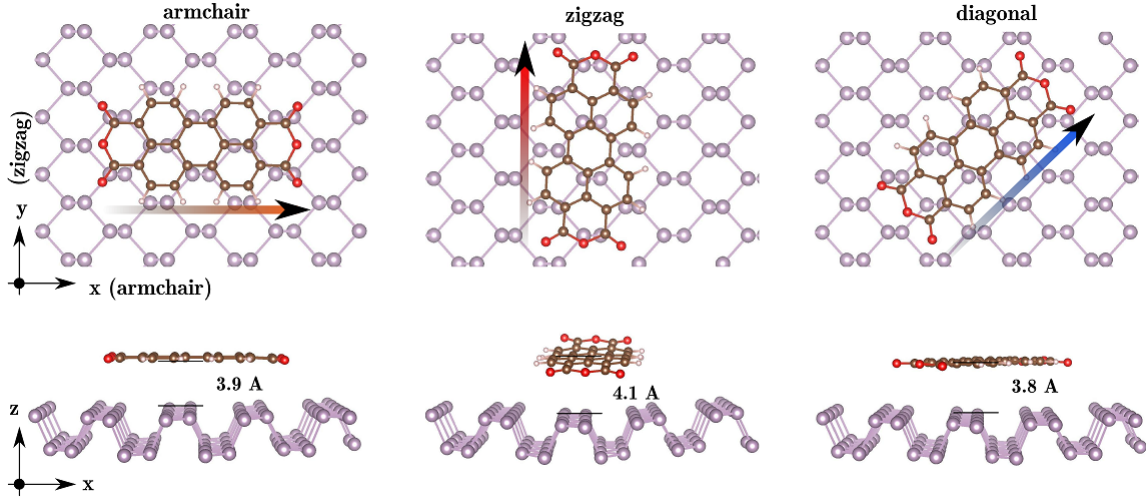

Figure S5: Top and side views of the optimized structures of PTCDA/BP along armchair direction (a), zigzag direction (b), and diagonal direction (c). The PTCDA/BP along diagonal direction own the lowest energy.

Table S1: Structural parameters and total energy of PTCDA/BP systems.

|          | a       | b       | c       | h      | Total Energy |
|----------|---------|---------|---------|--------|--------------|
| Armchair | 19.66 Å | 13.49 Å | 23.77 Å | 3.93 Å | -720.65 eV   |
| Zigzag   | 19.69 Å | 13.50 Å | 23.37 Å | 4.15 Å | -720.47 eV   |
| Diagonal | 19.69 Å | 13.49 Å | 23.91 Å | 3.81 Å | -720.74 eV   |

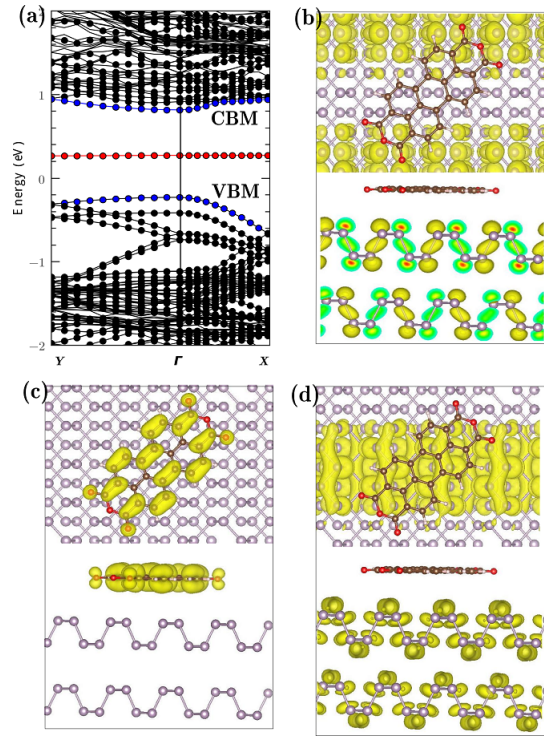

Figure S6: (a) Band structure of PTCDA on bilayer BP composite and the optimized structure of PTCAD molecule along the diagonal direction. The electronic wave function of (b) VBM, (c) Flat-band, and (d) CBM from top view (up) and side view (down), respectively.
